# Supplementary material for: Fine-Tuning the Antimicrobial Profile of Biocompatible Gold Nanoparticles by Sequential Surface Functionalization Using Polyoxometalates and Lysine
Source: PubMed Central journal article supplement (PMC3798406; doi:10.1371/journal.pone.0079676), 2013-10-17

**Figure S1.** Stability analysis of AuNPs<sup>Tyr</sup> in phosphate buffer saline (PBS) in the presence and absence of serum after 24 h incubation. No sign of aggregation of AuNPs<sup>Tyr</sup> is evident from no significant shifts in the surface plasmon resonance maxima of AuNPs<sup>Tyr</sup>.

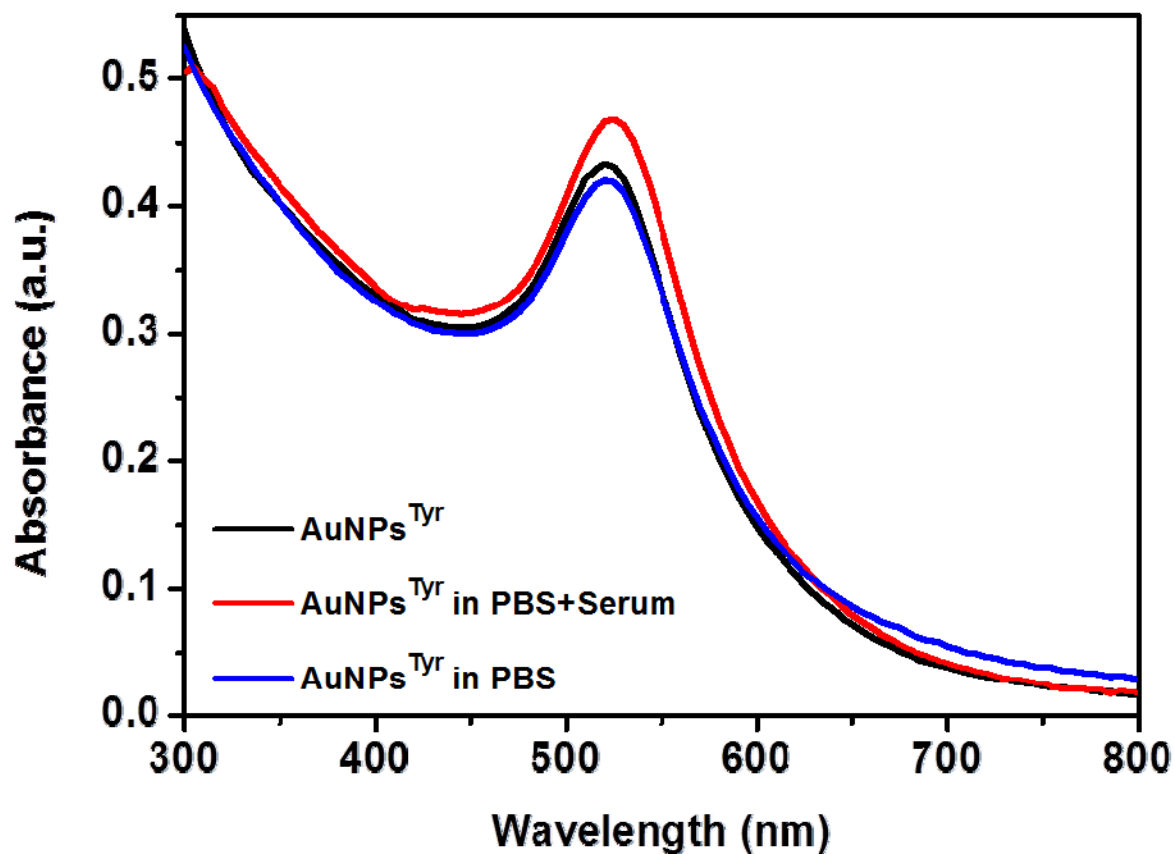

Supplement: pone.0079676.s001.pdf [file pone.0079676.s001.pdf]
