# Supplementary material for: Fine-Tuning the Antimicrobial Profile of Biocompatible Gold Nanoparticles by Sequential Surface Functionalization Using Polyoxometalates and Lysine
Source: PubMed Central journal article supplement (PMC3798406; doi:10.1371/journal.pone.0079676), 2013-10-17
Supplement: pone.0079676.s002.pdf [file pone.0079676.s002.pdf]

**Table S1.** FTIR vibrational modes arising from PTA, PMA, AuNPs<sup>Tyr</sup>, AuNPs<sup>Tyr@PTA</sup>, AuNPs<sup>Tyr@PTA-Lys</sup>, AuNPs<sup>Tyr@PMA</sup> and AuNPs<sup>Tyr@PMA-Lys</sup>.

| Sample Name                        | FTIR Signatures (cm <sup>-1</sup> ) |      |         |
|------------------------------------|-------------------------------------|------|---------|
|                                    | P-O                                 | Mo-O | Mo-O-Mo |
| <b>PMA</b>                         | 1058                                | 951  | 864     |
| <b>AuNPs<sup>Tyr@PMA</sup></b>     | 1078                                | 944  | 849     |
| <b>AuNPs<sup>Tyr@PMA-Lys</sup></b> | 1062                                | 938  | 850     |
|                                    | P-O                                 | W-O  | W-O-W   |
| <b>PTA</b>                         | 1075                                | 972  | 874     |
| <b>AuNPs<sup>Tyr@PTA</sup></b>     | 1097                                | 966  | 861     |
| <b>AuNPs<sup>Tyr@PTA-Lys</sup></b> | 1093                                | 954  | 855     |
