# Supplementary material for: Fine-Tuning the Antimicrobial Profile of Biocompatible Gold Nanoparticles by Sequential Surface Functionalization Using Polyoxometalates and Lysine
Source: PubMed Central journal article supplement (PMC3798406; doi:10.1371/journal.pone.0079676), 2013-10-17
Supplement: pone.0079676.s003.pdf [file pone.0079676.s003.pdf]

**Table S2.** XPS binding energies of core levels present in AuNPs<sup>Tyr</sup>, AuNPs<sup>Tyr@PTA</sup>, AuNPs<sup>Tyr@PTA-Lys</sup>, AuNPs<sup>Tyr@PMA</sup> and AuNPs<sup>Tyr@PMA-Lys</sup>.

| Sample                       | Binding Energy (eV) |                |                  |                            |        |                            |
|------------------------------|---------------------|----------------|------------------|----------------------------|--------|----------------------------|
|                              | Au4f                | W4f            | Mo4f             | C1s                        | N1s    | O1s                        |
| AuNPs <sup>Tyr</sup>         | 83.63<br>87.53      | -              | -                | 285.00<br>287.32<br>293.33 | 399.65 | 532.18                     |
| AuNPs <sup>Tyr@PTA</sup>     | 83.46<br>87.36      | 35.81<br>37.91 | -                | 285.00<br>286.82<br>288.96 | -      | 531.00<br>532.79           |
| AuNPs <sup>Tyr@PTA-Lys</sup> | 83.66<br>87.56      | 35.86<br>37.96 | -                | 285.00<br>286.58<br>288.55 | 399.96 | 531.57<br>530.76<br>533.42 |
| AuNPs <sup>Tyr@PMA</sup>     | 83.33<br>87.23      | -              | 231.83<br>235.03 | 285.00<br>287.66<br>288.09 | 398.01 | 531.33<br>533.01           |
| AuNPs <sup>Tyr@PMA-Lys</sup> | 83.65<br>87.55      | -              | 232.46<br>235.51 | 285.00<br>286.55<br>288.17 | 399.46 | 531.98<br>535.42           |
